# Supplementary material
Source: MDPI journal article supplement (https://www.mdpi.com/2076-3417/9/9/1958)
Supplement: s1 [file s1]

### **Supplementary material for**

#### **Decolorization of Orange-G Aqueous Solutions over C<sub>60</sub>/MCM-41 Photocatalysts**

John Kyriakopoulos<sup>1</sup>, Eleana Kordouli<sup>1,\*</sup>, Kyriakos Bourikas<sup>2</sup>, Christos Kordulis<sup>1,3</sup>, Alexis Lycourghiotis<sup>1</sup>

<sup>1</sup>Department of Chemistry, University of Patras, GR-26504, Patras, Greece

<sup>2</sup>School of Science and Technology, Hellenic Open University, Tsamadou 13-15, GR-26222, Patras, Greece

<sup>3</sup>Foundation for Research and Technology, Institute of Chemical Engineering Science (FORTH/ICE-HT), Stadiou str., Platani, P.O. Box 1414, GR-26504, Patras, Greece

\*Corresponding Author

Tel: +302610997143

E-mail: [ekordouli@upatras.gr](mailto:ekordouli@upatras.gr)

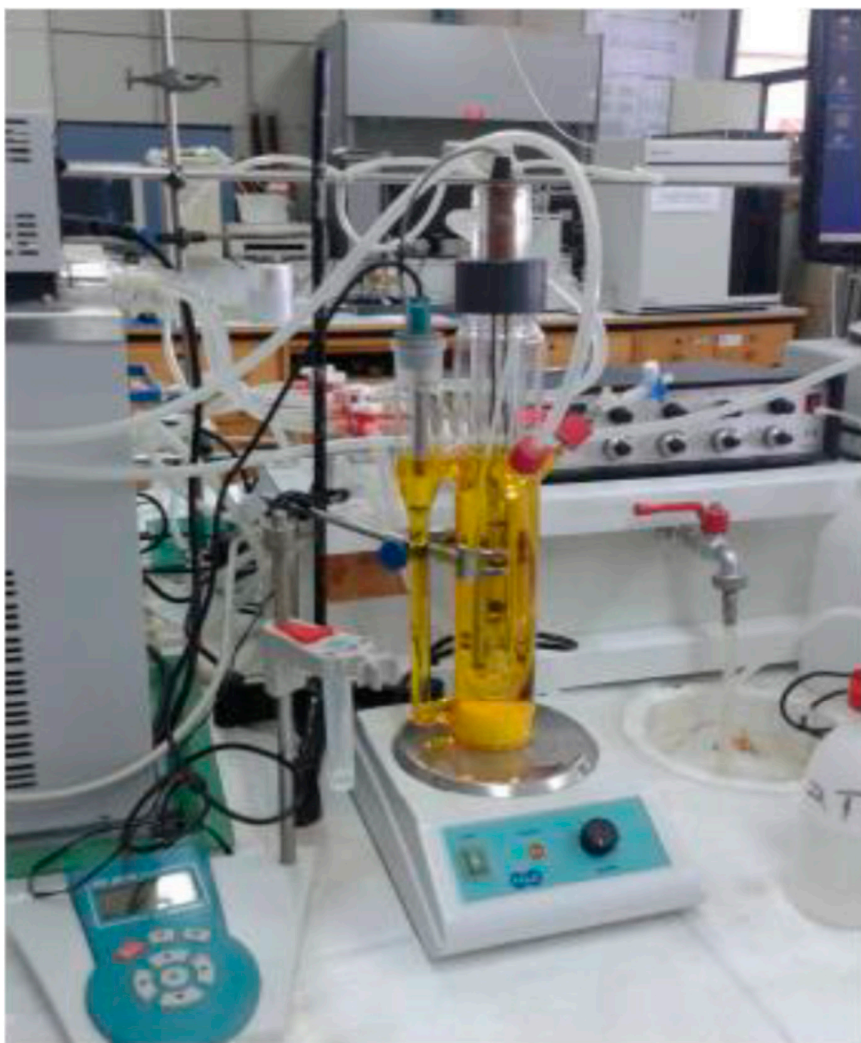

**Figure S1.** Photocatalytic reactor (Heraeus) with the TQ 150 lamp situated in a glass cooling jacket filled with re-circulated deionized water and immersed in the reaction mixture.

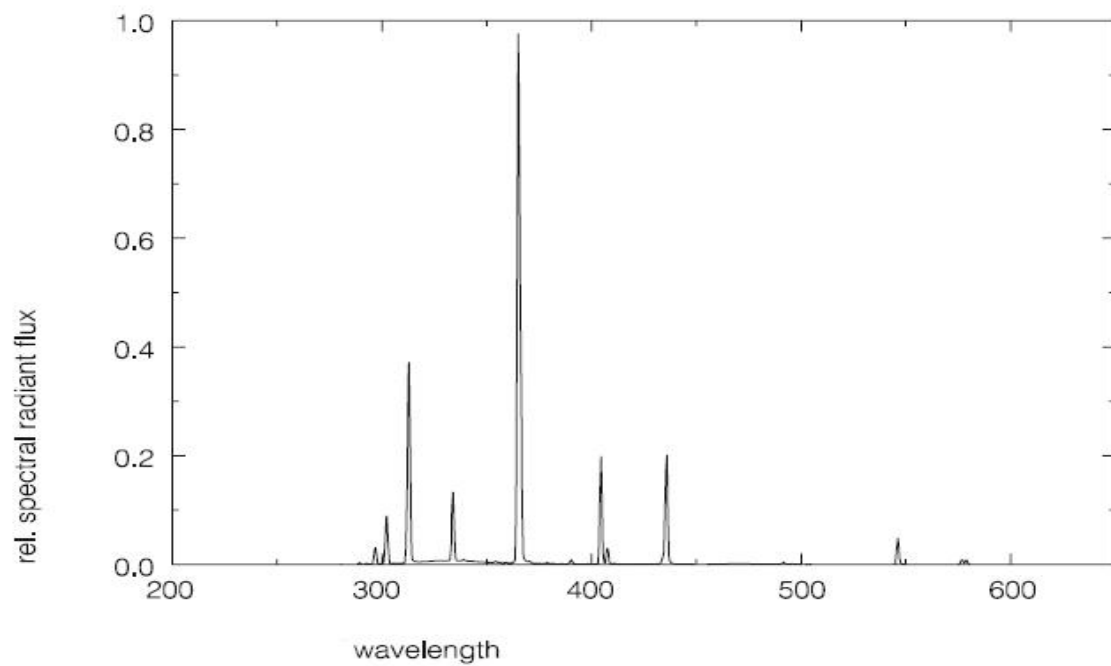

**Figure S2.** Relative spectral radiant flux of low pressure Hg lamp (TQ 150) being in a glass cooling jacket filled with re-circulated de-ionized water.
